# Supplementary material
Source: ML conference proceedings conference paper supplement (https://openaccess.thecvf.com/content/CVPR_2019/html/Kasten_GPSfM_Global_Projective_CVPR_2019_paper.html)
Supplement: Supplementary file 1 [file Kasten_GPSfM_Global_Projective_CVPR_2019_supplemental.pdf]

# GPSfM: Global Projective SFM Using Algebraic Constraints on Multi-View Fundamental Matrices -Supplementary Material-

Yoni Kasten\*      Amnon Geifman\*      Meirav Galun      Ronen Basri  
Weizmann Institute of Science

{yoni.kasten, amnon.geifman, meirav.galun, ronен.basri}@weizmann.ac.il

Below we prove Theorem 1. For clarity, we base the proof on several supporting lemmas, whose proofs follow. Also, our proof of Theorem 1 relies partly on necessary conditions that were introduced and proved in [1]. Those conditions are summarized in Lemma 2.

**Theorem 1.** *An  $n$ -view fundamental matrix  $F$  is consistent with a set of  $n$  cameras whose centers are not all collinear if, and only if, the following conditions hold:*

1.  $\text{Rank}(F) = 6$  and  $F$  has exactly 3 positive and 3 negative eigenvalues.
2.  $\text{Rank}(F_i) = 3$  for all  $i = 1, \dots, n$ .

*Proof.* The proof of the necessary conditions relies the properties of symmetric matrices specified in Lemma 1 and on [1], whose derivations are summarized in Lemma 2. Specifically, let  $F$  be a consistent,  $n$ -view fundamental matrix. Then, according to Lemma 2,  $F$  can be written as  $F = UV^T + VU^T$ , where  $U, V \in \mathbb{R}^{3n \times 3}$  whose  $3 \times 3$  blocks respectively are  $U_i = V_i T_i$  and  $V_i$ . And, moreover, since the camera centers are not all collinear, we have  $\text{rank}(F) = 6$ ,  $\text{rank}(U) = 3$  and  $\text{rank}(V) = 3$ , implying property (iii) of Lemma 1. Consequently, using property (i) of Lemma 1, condition 1 holds. Condition 2 holds because not all cameras are collinear, since if conversely  $\text{rank}(F_i) < 3$  for some  $i$  then there exists a 3-vector  $\mathbf{e} \neq 0$  such that  $F_i^T \mathbf{e} = 0$ , and therefore  $\forall j F_{ji} \mathbf{e} = 0$ , i.e., all epipoles collapse to the same point in frame  $i$ , implying, in contradiction, that the camera centers are all collinear.

To establish the sufficient condition, let  $F$  be an  $n$ -view fundamental matrix that satisfies conditions 1 and 2. Condition 1 (along with property (iii) of Lemma 1) implies that  $F$  can be decomposed into  $F = UV^T + VU^T$ . This decomposition, along with condition 2, allows to deduce, using Lemma 5, that WLOG  $\forall i, \text{rank}(V_i) = 3$  and  $\text{rank}(U_i) = 2$ . This, and the skew-symmetry of  $U_i V_i^T$  (due to  $F_{ii} = 0$ ), imply, using Lemma 4, that  $V_i^{-1} U_i$  is

skew-symmetric. Denote this matrix by  $T_i = [t_i]_{\times}$ , we obtain  $F_{ij} = V_i(T_i - T_j)V_j^T$ , establishing that  $F$  is consistent. Finally,  $\{t_i\}_{i=1}^n$  are not all collinear, since, otherwise, by Lemma 6,  $\exists i$  and  $\exists \mathbf{e} \neq 0$  such that  $\forall j F_{ji} \mathbf{e} = 0$ , implying that  $F_i^T \mathbf{e} = 0$ , contradicting the full rank of  $F_i$ . □

We next turn to stating and proving the supporting lemmas.

**Lemma 1.** *Let  $F \in \mathbb{S}^{3n}$  be a matrix of rank 6. Then, the following three conditions are equivalent.*

- (i)  $F$  has exactly 3 positive and 3 negative eigenvalues.
- (ii)  $F = XX^T - YY^T$  with  $X, Y \in \mathbb{R}^{3n \times 3}$  and  $\text{rank}(X) = \text{rank}(Y) = 3$ .
- (iii)  $F = UV^T + VU^T$  with  $U, V \in \mathbb{R}^{3n \times 3}$  and  $\text{rank}(U) = \text{rank}(V) = 3$ .

*Proof.* Assume (i), and denote the eigenvalues of  $F$  by  $\lambda_1 \geq \lambda_2 \geq \lambda_3 > 0 > \lambda_4 \geq \lambda_5 \geq \lambda_6$ . Applying spectral decomposition to  $F$  we obtain

$$F = [\tilde{X}, \tilde{Y}] \begin{pmatrix} \Sigma_1 & 0 \\ 0 & -\Sigma_2 \end{pmatrix} [\tilde{X}, \tilde{Y}]^T \\ = \tilde{X} \Sigma_1 \tilde{X}^T - \tilde{Y} \Sigma_2 \tilde{Y}^T,$$

where  $\tilde{X}, \tilde{Y} \in \mathbb{R}^{3n \times 3}$ ,  $\Sigma_1 = \text{diag}(\lambda_1, \lambda_2, \lambda_3)$  and  $\Sigma_2 = \text{diag}(-\lambda_4, -\lambda_5, -\lambda_6)$ . Next, we define  $X = \tilde{X} \sqrt{\Sigma_1}$  and  $Y = \tilde{Y} \sqrt{\Sigma_2}$  then

$$F = XX^T - YY^T,$$

where  $\text{rank}(X) = \text{rank}(Y) = 3$ , implying (ii). Next, let  $U = \sqrt{\frac{1}{2}}(X + Y)$  and  $V = \sqrt{\frac{1}{2}}(X - Y)$ . It can be readily verified that

$$F = UV^T + VU^T.$$

\*Equal contributors

Moreover, if either  $U$  or  $V$  are rank deficient then  $\text{rank}(F) < 6$ , contradicting the assumption. Therefore,  $\text{rank}(U) = \text{rank}(V) = 3$ , implying (iii).

To complete the proof, assume (iii), i.e.,  $F = UV^T + VU^T$ , where  $U, V \in \mathbb{R}^{3n \times 3}$  are of rank 3. We define  $X = \sqrt{\frac{1}{2}}(U + V)$  and  $Y = \sqrt{\frac{1}{2}}(U - V)$  yielding  $F = XX^T - YY^T$ , with  $\text{rank}(X) = \text{rank}(Y) = 3$ , implying (ii).

It remains to show that (ii)  $\Rightarrow$  (i). Since  $F$  is symmetric of degree 6, it has exactly 6 real, non-zero eigenvalues. We now show that exactly 3 of these eigenvalues are positive and 3 are negative. By contradiction, assume w.l.o.g. that  $F$  has at least 4 positive eigenvalues, denoted by  $\lambda_1, \lambda_2, \lambda_3, \lambda_4$ , and denote their corresponding eigenvectors by  $v_1, v_2, v_3, v_4$ . Denote the subspace spanned by these eigenvectors by  $S$ , i.e.,  $S = \text{span}\{v_1, v_2, v_3, v_4\}$ . Now, due to orthogonality, for every  $\sum_{i=1}^4 \alpha_i v_i = z \in S$  we have

$$Fz = \sum_{i=1}^4 \alpha_i \lambda_i v_i \Rightarrow z^T Fz = \sum_{i=1}^4 \alpha_i^2 \lambda_i.$$

Therefore, since  $\lambda_i > 0$ , for  $0 \neq z \in S$  we have,

$$z^T Fz = \sum_{i=1}^4 \alpha_i^2 \lambda_i > 0.$$

On the other hand, the dimension of the column space of  $X$  is at most 3 and therefore  $\exists \bar{z} \in S$ , which is orthogonal to the column space of  $X$ , i.e.  $X^T \bar{z} = 0$ , implying that

$$\bar{z}^T F \bar{z} = \bar{z}^T (XX^T - YY^T) \bar{z} = -\bar{z}^T YY^T \bar{z} \leq 0,$$

which contradicts our previous observation that every vector  $0 \neq z \in S$  satisfies  $z^T Fz > 0$ . The same argument can be applied to the negative eigenvalues. We conclude that  $F$  has exactly 3 positive eigenvalues and 3 negative eigenvalues.  $\square$

**Lemma 2.** [1] Let  $F$  be a consistent  $n$ -view fundamental matrix. Then,

1.  $F$  can be formulated as  $F = UV^T + VU^T$ , where  $V, U \in \mathbb{R}^{3n \times 3}$  consist of  $n$  blocks of size  $3 \times 3$

$$V = \begin{bmatrix} V_1 \\ \vdots \\ V_n \end{bmatrix} \quad U = \begin{bmatrix} V_1 T_1 \\ \vdots \\ V_n T_n \end{bmatrix}$$

and  $T_i = [\mathbf{t}_i]_{\times}$ .

2.  $\text{rank}(V) = 3$
3. If  $\mathbf{t}_i$  are not all collinear then  $\text{rank}(U) = 3$  and  $\text{rank}(F) = 6$ .

*Proof.* Condition 1 follows directly from Eq. (1) in the paper, namely

$$F_{ij} = V_i(T_i - T_j)V_j^T.$$

Condition 2 is satisfied since  $V_i$  is invertible for all  $i = 1, \dots, n$ . Next, we prove Condition 3 by contradiction. Assume  $\text{rank}(U) < 3$ . Then,  $\exists \mathbf{t} \neq 0$ , s.t.  $U\mathbf{t} = 0$ . Since  $V_i$  are of full rank for all  $i = 1, \dots, n$ , this implies that  $\mathbf{t}_i \times \mathbf{t} = 0$  for all  $i = 1, \dots, n$ . Thus, all the  $\mathbf{t}_i$ 's are parallel to  $\mathbf{t}$ , violating our assumption that not all  $\mathbf{t}_i$  are collinear.

We are left to show that if  $\mathbf{t}_i$  are not all collinear then  $\text{rank}(F) = 6$ . Using the QR decomposition for an invertible matrix, each  $V_i$  can be decomposed uniquely into a product of a lower triangular matrix with positive diagonal elements and an orthogonal matrix. Therefore, there exist an upper triangular  $K_i$  and an orthogonal matrix  $R_i$  such that  $V_i = K_i^{-T} R_i^T$ . We can thus write  $F = K^T E K$ , where the  $3n \times 3n$  matrix  $K$  is a block diagonal matrix with  $3 \times 3$  blocks formed by  $\{K_i^{-1}\}_{i=1}^n$ , and so it has full rank, implying that  $\text{rank}(F) = \text{rank}(E)$ . We are left to show that  $\text{rank}(E) = 6$ . Since  $E$  has the same form as in [1], the proof can be completed as described there ([1], p. 3).  $\square$

**Lemma 3.** Let  $A, B \in \mathbb{R}^{3 \times 3}$  such that  $\text{rank}(A) = \text{rank}(B) = 2$  and  $AB^T = [\mathbf{t}]_{\times}$  for some  $\mathbf{t} \in \mathbb{R}^3$  then  $A^T \mathbf{t} = B^T \mathbf{t} = 0$

*Proof.* Let  $\mathbf{t}_1 \in \text{Ker}(A^T)$  and  $\mathbf{t}_2 \in \text{Ker}(B^T)$ ,  $\mathbf{t}_1, \mathbf{t}_2 \neq 0$ . Note also that  $AB^T = [\mathbf{t}]_{\times}$  implies  $BA^T = -[\mathbf{t}]_{\times}$ . Then,

$$\begin{aligned} A^T \mathbf{t}_1 = 0 &\Rightarrow BA^T \mathbf{t}_1 = 0 \Rightarrow -\mathbf{t} \times \mathbf{t}_1 = 0 \\ &\Rightarrow \mathbf{t}_1 \parallel \mathbf{t} \Rightarrow A^T \mathbf{t} = 0. \end{aligned}$$

$$\begin{aligned} B^T \mathbf{t}_2 = 0 &\Rightarrow AB^T \mathbf{t}_2 = 0 \Rightarrow \mathbf{t} \times \mathbf{t}_2 = 0 \\ &\Rightarrow \mathbf{t}_2 \parallel \mathbf{t} \Rightarrow B^T \mathbf{t} = 0 \end{aligned}$$

$\square$

**Lemma 4.** Let  $A, B \in \mathbb{R}^{3 \times 3}$  with  $\text{rank}(A) = 2$ ,  $\text{rank}(B) = 3$  and  $AB^T$  is skew symmetric (that is  $AB^T + BA^T = 0$ ), then  $T = B^{-1}A$  is skew symmetric.

*Proof.* Since  $AB^T$  is skew symmetric it can be written as  $AB^T = [\mathbf{a}]_{\times}$  for some  $\mathbf{a} \in \mathbb{R}^3 \Rightarrow$

$$\begin{aligned} A &= [\mathbf{a}]_{\times} B^{-T} = BB^{-1}[\mathbf{a}]_{\times} B^{-T} \\ &= B(B^{-1}[\mathbf{a}]_{\times} B^{-T}) \\ &= B \frac{[B^T \mathbf{a}]_{\times}}{\det(B)} \end{aligned}$$

where the last equality follows from the following identity which holds for  $B \in \mathbb{R}^{3 \times 3}$

$$(B\mathbf{x}) \times (B\mathbf{y}) = \det(B)B^{-T}(\mathbf{x} \times \mathbf{y}).$$

Consequently,  $T = B^{-1}A = \frac{[B^T \mathbf{a}]_{\times}}{\det(B)}$  is skew symmetric.  $\square$

**Lemma 5.** Let  $F$  be an  $n$ -view fundamental matrix. If  $F$  can be formulated as  $F = UV^T + VU^T$  where  $U, V \in \mathbb{R}^{3n \times 3}$  and in addition  $\text{rank}(F_i) = 3$  for  $i = 1, \dots, n$  then it holds that either  $\forall i \text{rank}(V_i) = 3, \text{rank}(U_i) = 2$  or that  $\forall i \text{rank}(V_i) = 2, \text{rank}(U_i) = 3$ .

*Proof.* First, since  $\forall i F_{ii} = 0$ , it follows that  $\forall i U_i V_i^T$  is skew-symmetric, implying that  $\text{rank}(U_i V_i^T) = 2$ , and so both  $2 \leq \text{rank}(U_i) \leq 3$  and  $2 \leq \text{rank}(V_i) \leq 3$ , but both cannot have full rank. Of the remaining possibilities.

1.  $\exists i$  such that  $\text{rank}(U_i) = \text{rank}(V_i) = 2$ . According to Lemma 3,  $\exists \mathbf{t} \in \mathbb{R}^3$ , such that  $U_i^T \mathbf{t} = V_i^T \mathbf{t} = 0$ , implying that  $F_i^T \mathbf{t} = (V U_i^T + U V_i^T) \mathbf{t} = 0$ . However, this contradicts the full rank assumption over  $F_i$ .
2. Suppose, without loss of generality, that

$$\begin{aligned} \text{rank}(V_1) &= 3, \text{rank}(U_1) = 2 \\ \text{rank}(V_2) &= 2, \text{rank}(U_2) = 3. \end{aligned}$$

By Lemma 4, since  $U_1 V_1^T$  is skew symmetric and  $\text{rank}(V_1) = 3, \text{rank}(U_1) = 2$ , we obtain that  $T_1 = V_1^{-1} U_1$  is skew symmetric. By similar considerations  $T_2 = U_2^{-1} V_2$  is skew symmetric. This yields

$$\begin{aligned} F_{12} &= U_1 V_2^T + V_1 U_2^T \\ &= V_1 T_1 (-T_2) U_2^T + V_1 U_2^T \\ &= V_1 (-T_1 T_2 + I) U_2^T. \end{aligned}$$

Now, using the fact that  $\text{rank}(V_1) = \text{rank}(U_2) = 3$ , we obtain

$$\text{rank}(-T_1 T_2 + I) = \text{rank}(F_{12}) = 2. \quad (1)$$

In the next steps we show a contradiction to (1). Since  $\text{rank}(-T_1 T_2 + I) = 2$  then  $\exists \mathbf{v} \in \text{null}(-T_1 T_2 + I)$ ,  $\mathbf{v} \neq 0$  for which

$$\begin{aligned} (-T_1 T_2 + I) \mathbf{v} &= 0 \Rightarrow T_1 T_2 \mathbf{v} = \mathbf{v} \\ &\Rightarrow \mathbf{t}_1 \times (\mathbf{t}_2 \times \mathbf{v}) = \mathbf{v}. \end{aligned}$$

We conclude that  $\mathbf{t}_1^T \mathbf{v} = 0$ . Using the identity  $a \times (b \times c) = b(a^T c) - c(a^T b)$ , we obtain

$$\begin{aligned} \mathbf{t}_1 \times (\mathbf{t}_2 \times \mathbf{v}) &= \mathbf{v} \Rightarrow \\ \mathbf{t}_2 (\mathbf{t}_1^T \mathbf{v}) - \mathbf{v} (\mathbf{t}_1^T \mathbf{t}_2) &= \mathbf{v} \Rightarrow \\ -\mathbf{v} (\mathbf{t}_1^T \mathbf{t}_2) &= \mathbf{v} \Rightarrow \\ (\mathbf{t}_1^T \mathbf{t}_2) &= -1. \end{aligned}$$

Now, the subspace defined by  $\{\mathbf{u} \in \mathbb{R}^3 | \mathbf{t}_1^T \mathbf{u} = 0\}$  is of dimension 2. However, as we show below, it is contained in  $\text{null}(-T_1 T_2 + I)$ , contradicting (1), since any vector  $\mathbf{u}$  in this space satisfies

$$\begin{aligned} (-T_1 T_2 + I) \mathbf{u} &= -\mathbf{t}_1 \times (\mathbf{t}_2 \times \mathbf{u}) + \mathbf{u} \\ &= -\mathbf{t}_2 (\mathbf{t}_1^T \mathbf{u}) + \mathbf{u} (\mathbf{t}_1^T \mathbf{t}_2) + \mathbf{u} \\ &= -\mathbf{u} + \mathbf{u} = 0. \end{aligned}$$

Consequently, either  $\forall i \text{rank}(V_i) = 3, \text{rank}(U_i) = 2$  or  $\forall i \text{rank}(V_i) = 2, \text{rank}(U_i) = 3$ .  $\square$

For the next Lemma we note that in Lemma 5 and Theorem 1 we use the following property, which we justify below  $\text{rank}(F_i) = 3 \Leftrightarrow \text{rank}(F_i^T) = 3 \Leftrightarrow \text{null}(F_i^T) = \emptyset \Leftrightarrow \nexists \mathbf{t} \in \mathbb{R}^3, \mathbf{t} \neq 0, \text{s.t. } F_i^T \mathbf{t} = 0 \Leftrightarrow \nexists \mathbf{t} \in \mathbb{R}^3, \mathbf{t} \neq 0, \text{s.t. } \forall j F_{ji} \mathbf{t} = 0$ .

**Lemma 6.** Let  $V_1, \dots, V_n \in \mathbb{R}^{3 \times 3}$  and  $\mathbf{t}_1, \dots, \mathbf{t}_n \in \mathbb{R}^3$ . We define  $F_{ij} = V_i [\mathbf{t}_i - \mathbf{t}_j] \times V_j^T$  and assume that for  $i \neq j \text{rank}(F_{ij}) = 2$ . Then,  $\{\mathbf{t}_i\}_{i=1}^n$  are collinear if and only if  $\exists i \in \{1, \dots, n\}$  and  $\exists \mathbf{e} \in \mathbb{R}^3, \mathbf{e} \neq 0, \text{s.t. } \forall j F_{ji} \mathbf{e} = 0$ .

*Proof.*  $\Rightarrow$  We first assume that  $\{\mathbf{t}_i\}_{i=1}^n$  are collinear. We show it by construction. Let us choose  $i \neq 1$  and define

$$\mathbf{e} = V_i^{-1} (\mathbf{t}_i - \mathbf{t}_1).$$

Since  $\mathbf{t}_i \neq \mathbf{t}_1$  (otherwise the rank assumption is violated) then  $\mathbf{e} \neq 0$  and the collinear points  $\mathbf{t}_1, \dots, \mathbf{t}_n$  can be parameterized as follows

$$\mathbf{t}_k = \mathbf{t}_1 + \alpha_k (\mathbf{t}_i - \mathbf{t}_1) \quad \forall k.$$

Now,  $\forall j$  it holds that

$$\begin{aligned} F_{ji} \mathbf{e} &= V_j (\mathbf{t}_j - \mathbf{t}_i) \times V_i^T V_i^{-T} (\mathbf{t}_i - \mathbf{t}_1) \\ &= V_j (\mathbf{t}_j - \mathbf{t}_i) \times (\mathbf{t}_i - \mathbf{t}_1) \\ &= V_j ((\alpha_j - \alpha_i) (\mathbf{t}_i - \mathbf{t}_1)) \times (\mathbf{t}_i - \mathbf{t}_1) = 0. \end{aligned}$$

$\Leftarrow$  Without loss of generality, we assume that  $i \neq 1$ . Therefore,  $\exists \mathbf{e} \in \mathbb{R}^3, \mathbf{e} \neq 0 \text{ s.t. } \forall j F_{ji} \mathbf{e} = 0$ . Since  $F_{1i} = V_1 [\mathbf{t}_1 - \mathbf{t}_i] \times V_i^T \Rightarrow V_i^{-T} (\mathbf{t}_i - \mathbf{t}_1) \in \text{null}(F_{1i})$ . Assuming that  $\text{rank}(F_{1i}) = 2$  then the dimension of  $\text{null}(F_{1i})$  is 1, implying that  $\mathbf{e} = \alpha V_i^{-T} (\mathbf{t}_i - \mathbf{t}_1)$ , where  $\alpha \neq 0$  is a scalar. Now,  $\forall j$

$$\begin{aligned} F_{ji} \mathbf{e} = 0 &\Rightarrow V_j [\mathbf{t}_j - \mathbf{t}_i] \times V_i^T V_i^{-T} (\mathbf{t}_i - \mathbf{t}_1) = 0 \\ &\Rightarrow V_j [\mathbf{t}_j - \mathbf{t}_i] \times (\mathbf{t}_i - \mathbf{t}_1) = 0 \\ &\Rightarrow (\mathbf{t}_j - \mathbf{t}_i) \times (\mathbf{t}_i - \mathbf{t}_1) = 0 \\ &\Rightarrow \exists \alpha_j \in \mathbb{R} \text{ s.t. } \mathbf{t}_j - \mathbf{t}_i = \alpha_j (\mathbf{t}_i - \mathbf{t}_1) \\ &\Rightarrow \mathbf{t}_j = \mathbf{t}_i + \alpha_j (\mathbf{t}_i - \mathbf{t}_1) \end{aligned}$$

concluding that the points are collinear.  $\square$

## References

- [1] S. Sengupta, T. Amir, M. Galun, T. Goldstein, D. W. Jacobs, A. Singer, and R. Basri. A new rank constraint on multi-view fundamental matrices, and its application to camera location recovery. In *Proceedings of the IEEE Conference on Computer Vision and Pattern Recognition*, pages 4798–4806, 2017.
